# Supplementary material for: Inhibition of Nicotine Metabolism by Cannabidiol (CBD) and 7-Hydroxycannabidiol (7-OH-CBD)
Source: PubMed Central journal article supplement — Chem Res Toxicol. 2023 Jan 10;36(2):177–87. doi: 10.1021/acs.chemrestox.2c00259 (PMC9945182; doi:10.1021/acs.chemrestox.2c00259), 2023-01-10
Supplement: tx2c00259_si_001.pdf [file tx2c00259_si_001.pdf]

# **Inhibition of nicotine metabolism by cannabidiol (CBD) and 7-hydroxycannabidiol (7-OH-CBD)**

Shamema Nasrin<sup>a,†</sup>, Shelby Coates<sup>a,†</sup>, Keti Bardhi<sup>a,†</sup>, Christy Watson<sup>a</sup>, Joshua E Muscat<sup>b</sup>, Philip Lazarus<sup>a,\*</sup>

<sup>a</sup> Department of Pharmaceutical Sciences, College of Pharmacy and Pharmaceutical Sciences, Washington State University, Spokane, Washington, USA 99223; <sup>b</sup> Penn State Cancer Institute, Department of Public Health Sciences, Penn State University College of Medicine, Hershey, PA 17033

| <u>Table Of Contents</u> | <u>Page #</u> |
|--------------------------|---------------|
| Cover Page               | 1             |
| Supplemental Table 1     | 2             |

**Supplemental Table 1.** Mass spectrometry conditions for individual nicotine metabolites.<sup>a</sup>

| Mass trans: |       | Retention Time<br>(min) | Metabolite                 | Collision Energy<br>(volts) | Cone<br>(volts) |
|-------------|-------|-------------------------|----------------------------|-----------------------------|-----------------|
| Q1          | Q3    |                         |                            |                             |                 |
| 163.1       | 106.0 | 1.94                    | Nicotine                   | 27                          | 30              |
| 182.0       | 109.0 | 1.16                    | HPBA                       | 30                          | 25              |
| 179.1       | 117.1 | 2.68                    | Nicotine- <i>N'</i> -oxide | 28                          | 25              |
| 339.1       | 163.1 | 2.28                    | Nicotine-Gluc              | 15                          | 20              |
| 177.1       | 98.0  | 3.04                    | Cotinine                   | 20                          | 40              |
| 193.1       | 96.0  | 1.75                    | Cotinine- <i>N'</i> -oxide | 25                          | 40              |
| 353.1       | 177.1 | 2.04                    | Cotinine-Gluc              | 15                          | 30              |
| 193.1       | 80.0  | 2.40                    | 3HC                        | 20                          | 40              |
| 369.1       | 193.1 | 1.80                    | 3HC-Gluc                   | 15                          | 30              |
| 149.1       | 129.8 | 2.62                    | Nornicotine                | 20                          | 30              |

<sup>a</sup> The dwell time for all metabolites was 100 msec. The declustering potential (DP), entrance potential (EP), and collision cell exit potential (CXP) was 30, 10, and 10 volts, respectively.
